# Supplementary material for: Risk factors for viral RNA shedding in COVID-19 patients
Source: PubMed Central journal article supplement — Eur Respir J. 2020 Jul 2;56(1):2001190. doi: 10.1183/13993003.01190-2020 (PMC7236829; doi:10.1183/13993003.01190-2020), 2020-07-02
Supplement: ERJ-01190-2020.Shareable.pdf [file ERJ-01190-2020.Shareable.pdf]

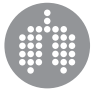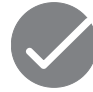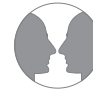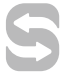

SHAREABLE PDF

# Risk factors for viral RNA shedding in COVID-19 patients

Yu Fu<sup>1,7</sup>, Ping Han<sup>2,7</sup>, Rui Zhu<sup>3,7</sup>, Tao Bai<sup>4,7</sup>, Jianhua Yi<sup>5</sup>, Xi Zhao<sup>1</sup>, Meihui Tao<sup>6</sup>, Runze Quan<sup>1</sup>, Chaoyue Chen<sup>1</sup>, Ying Zhang<sup>1</sup>, Qin He<sup>2</sup>, Mengjia Jing<sup>2</sup>, Xiaofeng Xiong<sup>2</sup>, Dean Tian<sup>2</sup> and Wei Yan<sup>2</sup>

**Affiliations:** <sup>1</sup>Dept of Gastroenterology, Union Hospital, Tongji Medical College, Huazhong University of Science and Technology, Wuhan, China. <sup>2</sup>Dept of Gastroenterology, Tongji Hospital, Tongji Medical College, Huazhong University of Science and Technology, Wuhan, China. <sup>3</sup>Dept of Integrated Chinese and Western Medicine, Union Hospital, Tongji Medical College, Huazhong University of Science and Technology, Wuhan, China. <sup>4</sup>Dept of Infectious Disease, Jin Yin-tan Hospital, Wuhan, China. <sup>5</sup>Dept of Infectious Disease, Union Hospital, Tongji Medical College, Huazhong University of Science and Technology, Wuhan, China. <sup>6</sup>Medical College of Zhengzhou University, Zhengzhou, China. <sup>7</sup>Authors contributed equally.

**Correspondence:** Wei Yan, Dept of Gastroenterology, Tongji Hospital, Tongji Medical College, Huazhong University of Science and Technology, Wuhan, Hubei 430022, P.R. China. E-mail: yanwei@tjhu.edu.cn

 @ERSpublications

**The median time of SARS-CoV-2 viral RNA shedding was 19 days. Patients with coronary heart disease comorbidity or decreased albumin levels experienced delays in clearance of SARS-CoV-2 RNA.**  
<https://bit.ly/2zjQu64>

**Cite this article as:** Fu Y, Han P, Zhu R, *et al.* Risk factors for viral RNA shedding in COVID-19 patients. *Eur Respir J* 2020; 56: 2001190 [<https://doi.org/10.1183/13993003.01190-2020>].

This single-page version can be shared freely online.

## *To the Editor:*

Since there is an increasing number of coronavirus disease 2019 (COVID-19) cases confirmed in multiple countries around the world, resulting in alarmingly high mortality and morbidity [1], the World Health Organization has declared a global pandemic [2]. To our knowledge, most current research on COVID-19 focuses on the epidemiology, clinical features and treatment, but not on viral RNA shedding. Here, we discuss COVID-19 viral RNA conversion time and the risk factors associated with viral RNA shedding in a large patient cohort.
